# Supplementary material for: The precision of satellite-based net irrigation quantification in the Indus and Ganges basins
Source: Copernicus journal article supplement (doi:10.5194/hess-27-2463-2023), 2023-07-06
Supplement: Supplementary file 1 [file hess-27-2463-2023-supplement.pdf]

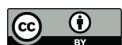

*Supplement of*

## **The precision of satellite-based net irrigation quantification in the Indus and Ganges basins**

**Søren J. Kragh et al.**

*Correspondence to:* Søren J. Kragh ([sjk@geus.dk](mailto:sjk@geus.dk))

The copyright of individual parts of the supplement might differ from the article licence.

Supplementary material

5

Table S1. Overview of calibration/validation statistics, calibrated parameters, and parameter bounds for all 16 calibrations.

|                        | calibration   |       |       |       | validation    |             |          |              |            |            |       |         |           |        |       |        |  |  |
|------------------------|---------------|-------|-------|-------|---------------|-------------|----------|--------------|------------|------------|-------|---------|-----------|--------|-------|--------|--|--|
|                        | (2003 - 2007) |       |       |       | (2008 - 2012) |             |          |              |            |            |       |         |           |        |       |        |  |  |
|                        | MAE           | SPAEF | MAE   | SPAEF | canintfact    | ptflowconst | ptflowdb | rotfrcoffore | rotfrcofsa | rotfrcofcl | fcmin | fcdelta | infshapef | pet_ap | pet_b | pet_c  |  |  |
| Parameter range (low)  |               |       |       |       | 0.15          | 0.8         | -0.27    | 0.94         | 0.0003     | 0.94       | 0.05  | 0.05    | 0.2       | 0.1    | 0.8   | -1.2   |  |  |
| Parameter range (high) |               |       |       |       | 0.4           | 1.2         | -0.07    | 0.97         | 0.1        | 0.999      | 0.15  | 0.3     | 1         | 0.3    | 1.4   | -0.8   |  |  |
| NTSG_CHIRPS            | 13.41         | 0.63  | 16.13 | 0.66  | 0.150         | 0.800       | -0.270   | 0.942        | 0.044      | 0.996      | 0.142 | 0.069   | 0.200     | 0.196  | 0.953 | -0.943 |  |  |
| NTSG_ERA5-Land         | 15.07         | 0.63  | 17.70 | 0.63  | 0.150         | 0.857       | -0.200   | 0.944        | 0.074      | 0.978      | 0.133 | 0.148   | 0.269     | 0.156  | 0.800 | -0.930 |  |  |
| NTSG_MSWEF             | 15.73         | 0.60  | 19.36 | 0.64  | 0.150         | 0.800       | -0.270   | 0.940        | 0.051      | 0.978      | 0.139 | 0.084   | 0.387     | 0.110  | 0.875 | -1.002 |  |  |
| NTSG_PERSIAN-CDR       | 15.19         | 0.67  | 18.21 | 0.61  | 0.173         | 0.964       | -0.270   | 0.940        | 0.084      | 0.997      | 0.145 | 0.053   | 0.200     | 0.100  | 1.044 | -0.873 |  |  |
| NTSG_TRMM              | 14.36         | 0.64  | 17.42 | 0.62  | 0.178         | 0.826       | -0.270   | 0.940        | 0.087      | 0.992      | 0.104 | 0.210   | 0.200     | 0.206  | 0.958 | -0.800 |  |  |
| FLUXCOM_CHIRPS         | 15.95         | 0.75  | 15.82 | 0.73  | 0.243         | 1.175       | -0.148   | 0.949        | 0.057      | 0.972      | 0.118 | 0.127   | 0.334     | 0.194  | 1.199 | -0.800 |  |  |
| FLUXCOM_ERA5-Land      | 15.39         | 0.74  | 16.06 | 0.72  | 0.150         | 1.025       | -0.128   | 0.965        | 0.026      | 0.970      | 0.101 | 0.250   | 0.503     | 0.116  | 1.149 | -0.816 |  |  |
| FLUXCOM_MSWEF          | 14.92         | 0.74  | 16.44 | 0.76  | 0.278         | 1.124       | -0.270   | 0.940        | 0.100      | 0.955      | 0.150 | 0.116   | 0.554     | 0.195  | 0.977 | -1.001 |  |  |
| FLUXCOM_PERSIAN-CDR    | 14.56         | 0.77  | 15.46 | 0.65  | 0.242         | 1.128       | -0.146   | 0.970        | 0.074      | 0.999      | 0.081 | 0.108   | 0.200     | 0.108  | 1.308 | -1.117 |  |  |
| FLUXCOM_TRMM           | 15.55         | 0.73  | 16.45 | 0.70  | 0.196         | 0.961       | -0.094   | 0.966        | 0.041      | 0.968      | 0.050 | 0.257   | 0.339     | 0.241  | 1.005 | -1.029 |  |  |
| PML-v2_CHIRPS          | 16.78         | 0.75  | 20.26 | 0.79  | 0.244         | 0.819       | -0.241   | 0.940        | 0.100      | 0.966      | 0.129 | 0.236   | 1.000     | 0.300  | 0.814 | -1.025 |  |  |
| PML-v2_ERA5-Land       | 15.05         | 0.74  | 20.00 | 0.78  | 0.400         | 0.851       | -0.134   | 0.953        | 0.084      | 0.957      | 0.132 | 0.266   | 1.000     | 0.227  | 0.800 | -1.200 |  |  |
| PML-v2_MSWEF           | 15.56         | 0.63  | 20.34 | 0.68  | 0.280         | 0.800       | -0.197   | 0.941        | 0.091      | 0.959      | 0.150 | 0.238   | 0.980     | 0.300  | 0.800 | -1.021 |  |  |
| PML-v2_PERSIAN-CDR     | 14.25         | 0.81  | 18.72 | 0.74  | 0.400         | 1.161       | -0.178   | 0.970        | 0.087      | 0.963      | 0.135 | 0.291   | 0.533     | 0.274  | 0.825 | -1.166 |  |  |
| PML-v2_TRMM            | 15.05         | 0.76  | 18.95 | 0.77  | 0.400         | 0.971       | -0.104   | 0.940        | 0.099      | 0.940      | 0.138 | 0.193   | 1.000     | 0.300  | 0.800 | -1.200 |  |  |
| ERA5-Land_ERA5-Land    | 14.34         | 0.80  | 15.90 | 0.77  | 0.302         | 0.800       | -0.070   | 0.944        | 0.100      | 0.970      | 0.150 | 0.264   | 0.974     | 0.300  | 0.869 | -1.200 |  |  |

10

15

Supplementary material

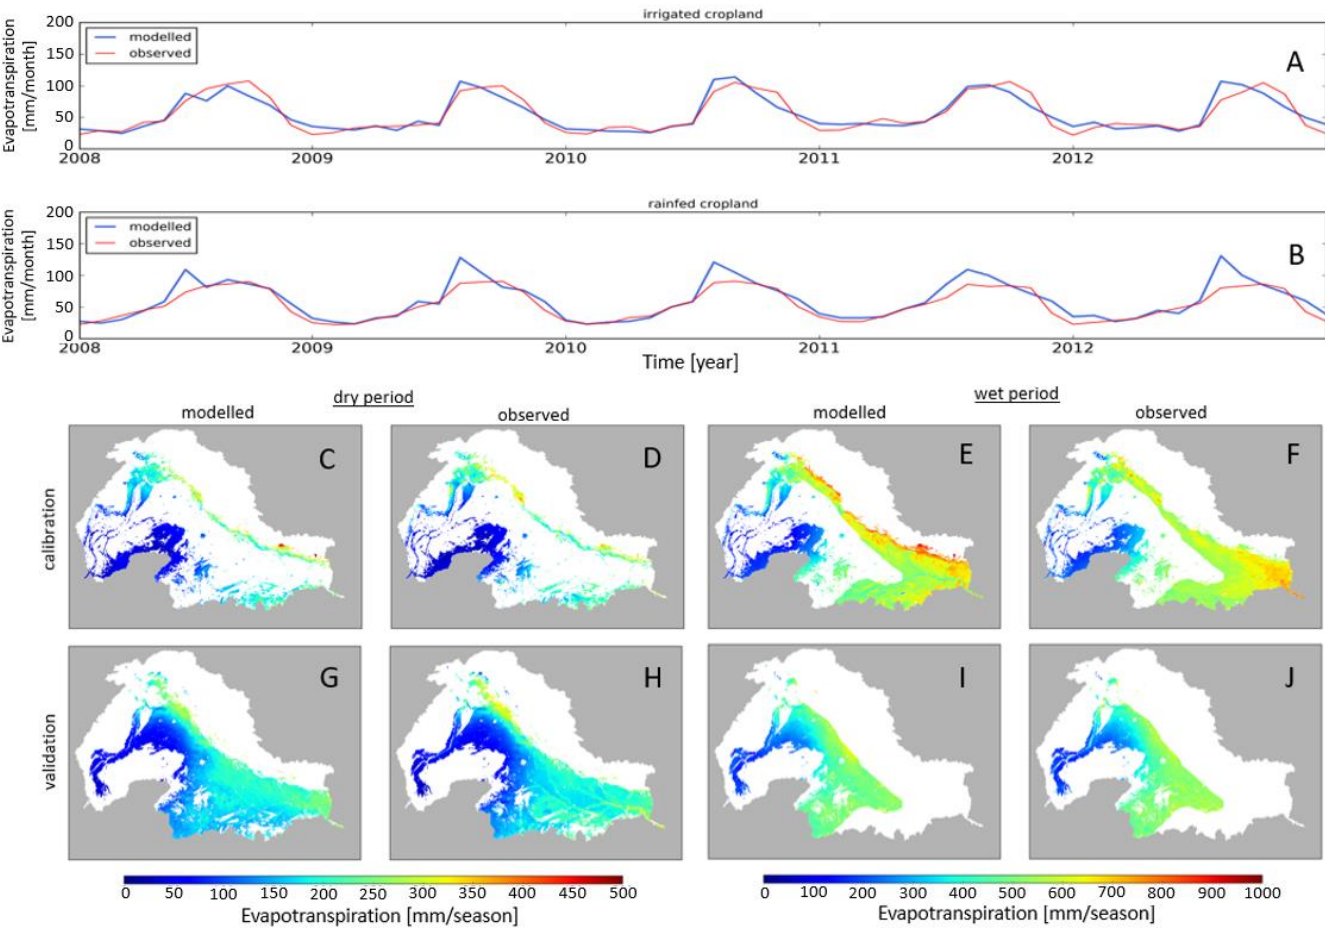

20 **Figure S1. Overview of temporal and spatial ET bias time series and maps for ERA5-Land calibration from validation period 2008 - 2012. A-B: time series of monthly MAE of irrigated and rainfed areas. C-F: Modelled and observed ET maps for rainfed cropland and natural vegetation for dry and wet seasons. G-J: Modelled and observed ET maps for irrigated cropland for dry and wet seasons. White areas within the irrigation maps are not included in the calibration or validation.**

25 To quantify irrigation, the model is first calibrated against rainfed cropland ET and then the model parameters are transferred to irrigated cropland to simulate a rainfed baseline. This parameter transfer can be validated by comparing the ERA5-Land remote sensing dataset that does not include irrigation thus representing rainfed conditions over the entire cropland and the modeled rainfed baseline over irrigated cropland. The two time series Figure S1A and S1B show the modeled and observed evapotranspiration from irrigated and rainfed areas respectively. We expect the modeled and observed time series for irrigated

30 cropland to be similar as this would validate the ability of the parameter transfers to reproduce the rainfed ET for the irrigated  
cropland. Had ERA5-Land incorporated irrigation a second peak in ET would have been visible during the dry period as a  
consequence of irrigation and the difference between the reference peak and baseline would have been assumed to be net  
irrigation. It can be seen that modeled ET over rainfed cropland shows distinct peaks during the wet season which is due to  
conceptual errors within the model that seem to overestimate rainfed ET at rainfed croplands along the Himalayan mountains  
35 (Figure S1E and S1F). Nevertheless, the spati-temporal similarities between the rainfed baseline and ERA5-Land over irrigated  
cropland support the validity of our approach. The spatial maps also confirm the spatial parameter transfer from rainfed to  
irrigated was able to reproduce the rainfed ERA5-Land ET over irrigated cropland (Figure S1G – S1J).
